# Supplementary material for: Regulation of UNC-40/DCC and UNC-6/Netrin by DAF-16 promotes functional rewiring of the injured axon
Source: Oxford University Press journal article supplement (doi:10.1242/dev.198044), 2021-06-01
Supplement: dev198044supp.pdf [file dev198044supp.pdf]

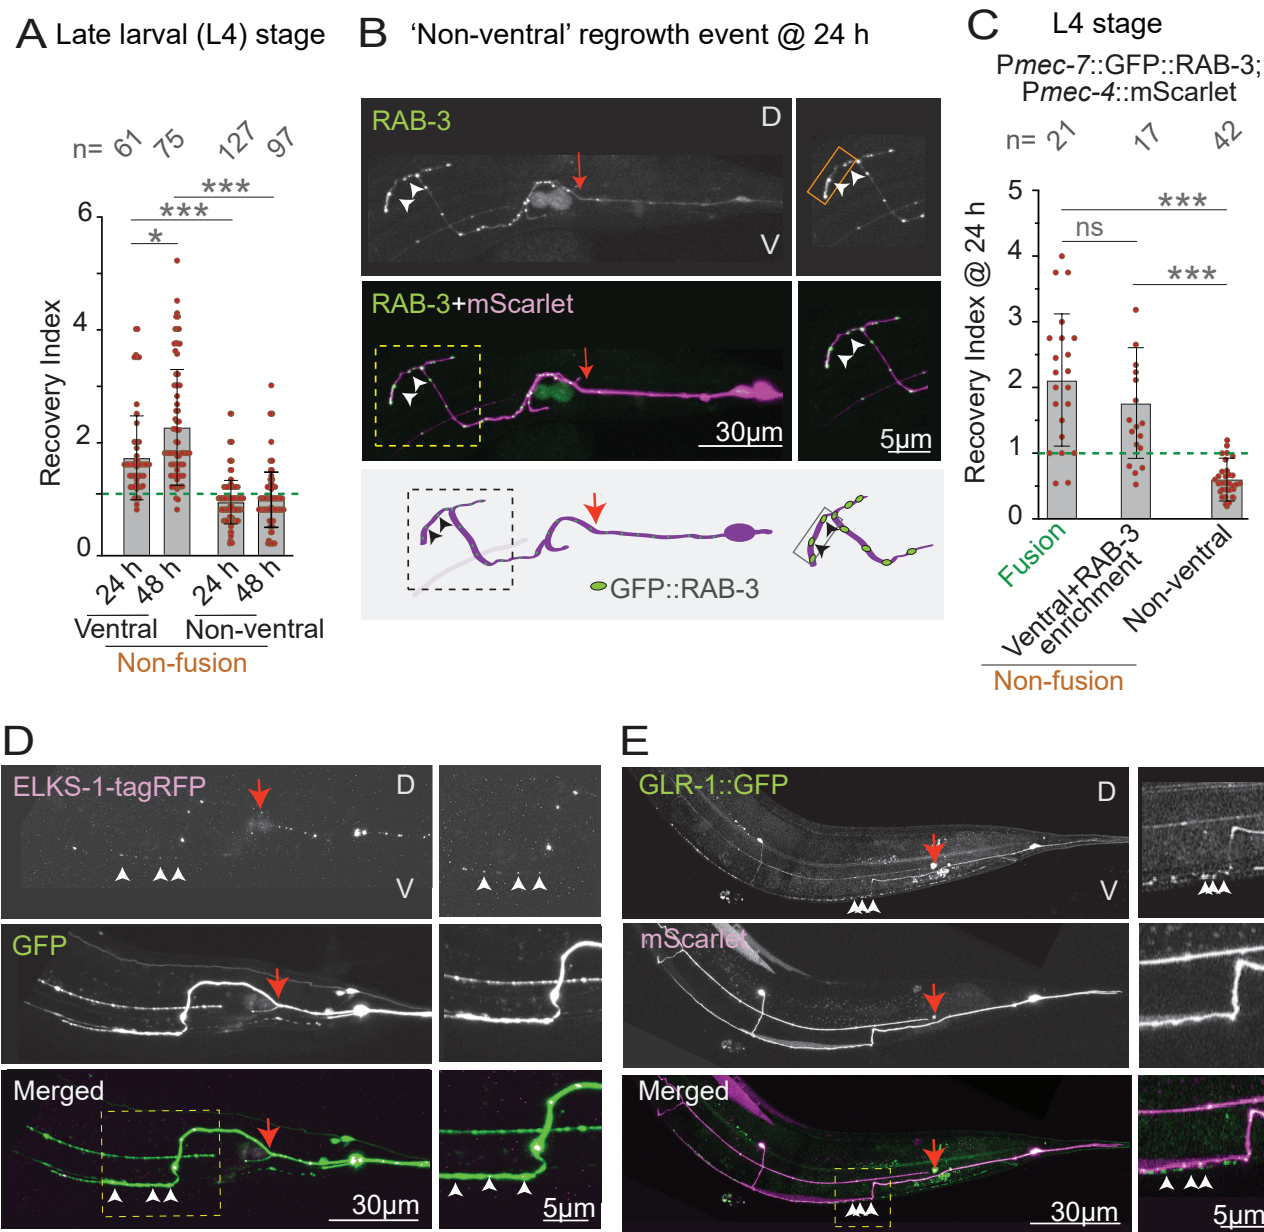

**Figure S1: 'Ventral targeting' events often correspond to the enrichment of pre-synaptic reporters at the ventral cord, related to Figure 1.**

A) The quantification of the 'Recovery Index' for the 'ventral' and 'non-ventral' regrowth events. N (independent replicates) = 8. B) The confocal image of a 'non-ventral' regrowth event at 24

h postaxotomy of PLM neuron co-expressing the *Pmec-7::GFP::RAB-3* [*jsIs821*] and *Pmec-4::mScarlet* [*shrEx209*] reporters. The arrowheads indicate the GFP-RAB-3 punctae localized at the tip of the regrowing axon. The rectangular ROI of 3  $\mu\text{m}$  was used to measure RAB-3 intensity. The red arrow represents the site of injury. C) RI values corresponding to the 'fusion', 'ventral' and 'non-ventral' regrowth events at 24 h postaxotomy in the *Pmec-7::GFP::RAB-3* [*jsIs821*]; *Pmec-4::mScarlet* [*shrEx209*] background. N=3-5. D) The confocal image of a 'ventral targeting' event in worm co-expressing *Pmec-4::ELKS-1::tag RFP* [*jsIs1075*] and *Pmec-7::GFP* [*mul32*] reporters. The arrowheads indicate the presynaptic enrichment of ELKS-1. E) The confocal image of similar 'ventral targeting' event in worm co-expressing *Prig-3::GLR-1::GFP* [*akIs141*] and *Pmec-4::mScarlet* [*shrEx209*] reporters. The post-synaptic enrichment of GLR-1 is indicated with arrowheads. In A and C, \*P < 0.05; \*\*\*P < 0.001; ns: non-significant, ANOVA with Tukey's multiple comparisons test. Error bars represent Standard Deviation.

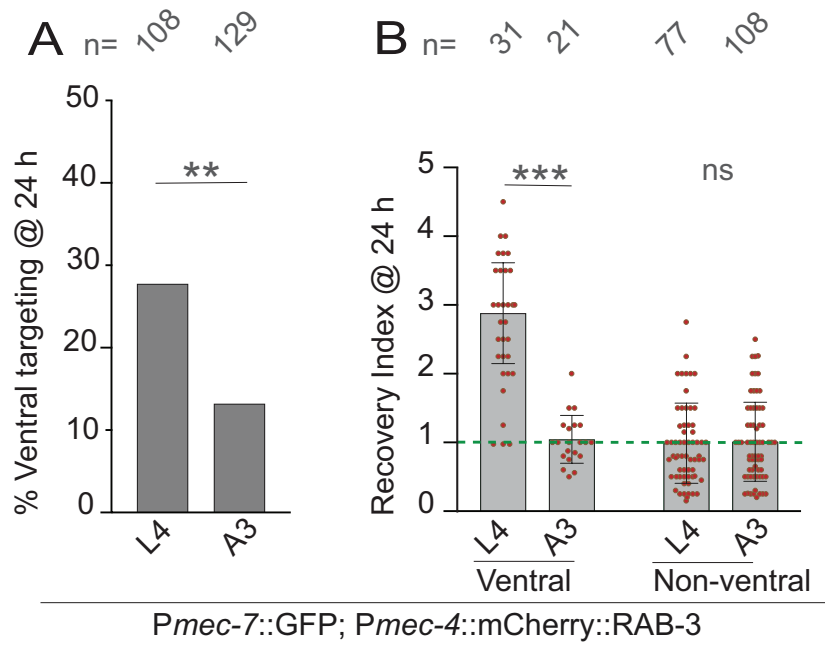

**Figure S2: Age related decline in 'ventral targeting' and functional restoration in *Pmec-4::mCherry::RAB-3* background, related to Figure 2.**

A) the percentage of 'ventral targeting' events. B) and RI values corresponding to the different regrowth events in the background expressing *Pmec-7::GFP* [*muls32*] and *Pmec-4::mCherry::RAB-3* [*tbls227*]. N (independent replicates) = 3-5. In A, \*\*P < 0.01; ns: non-significant; ANOVA with Tukey's multiple comparisons test. In B, \*\*\*P < 0.001, Fisher's exact test. Error bars represent Standard Deviation.

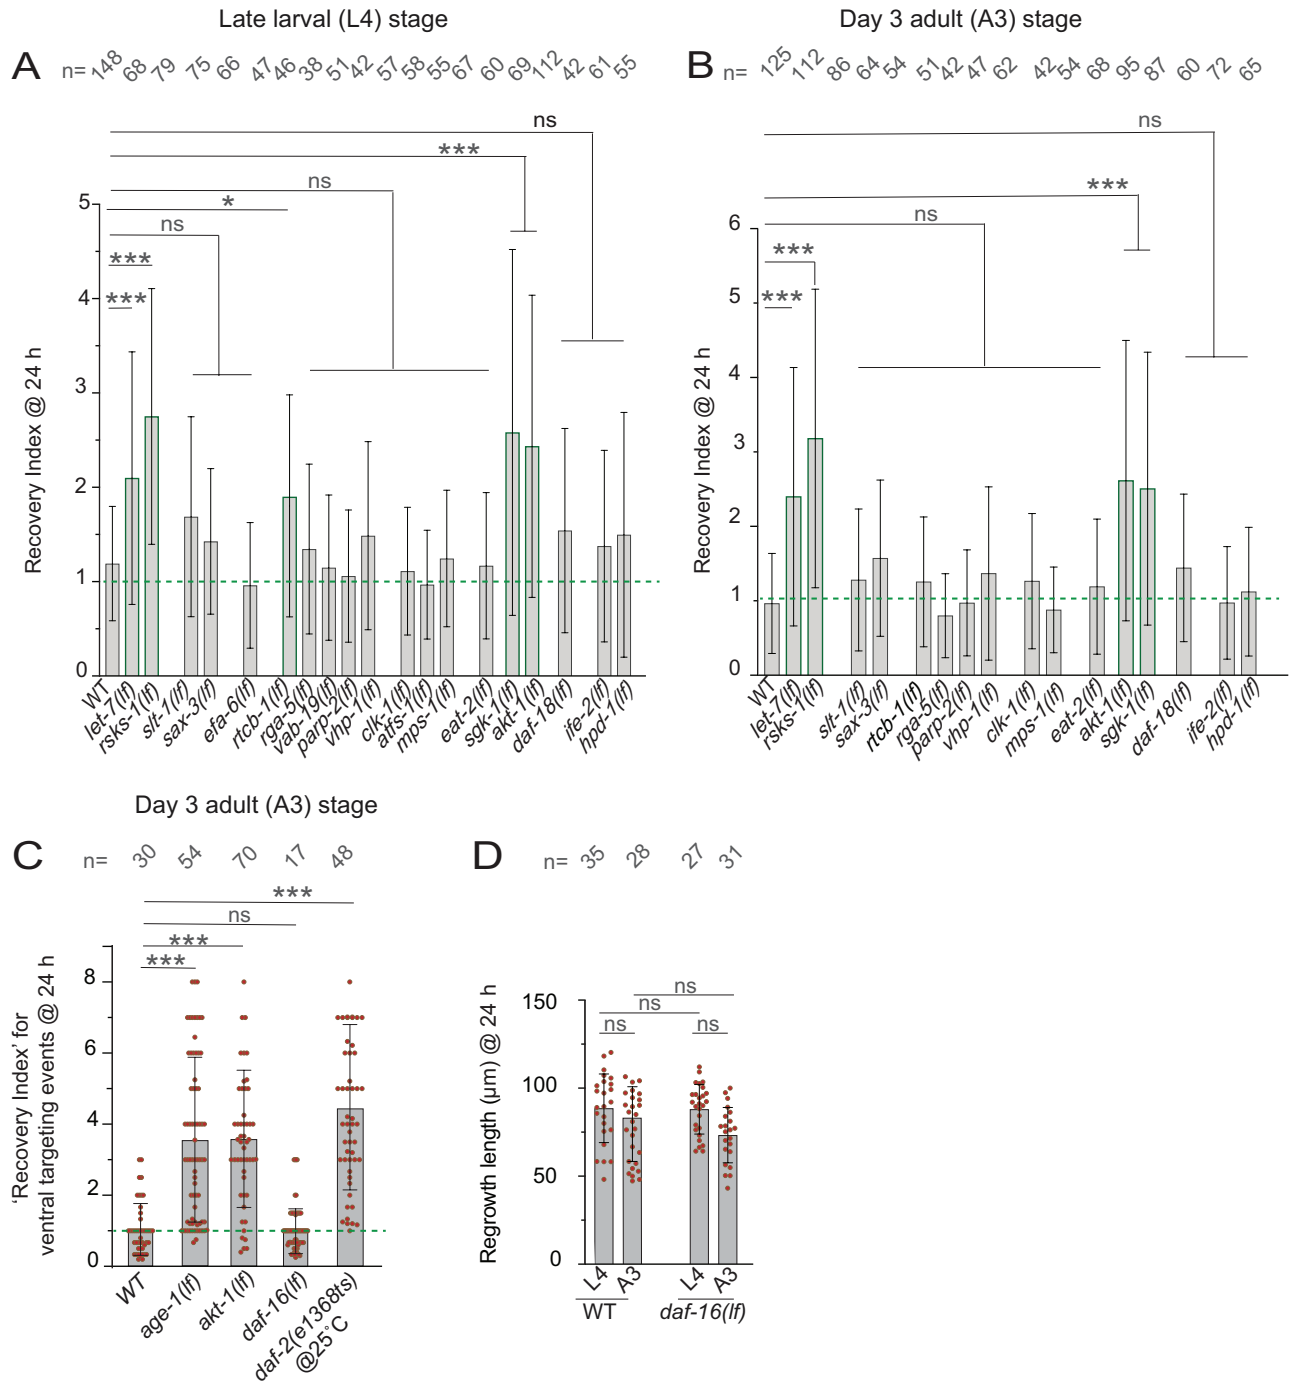

**Figure S3: Mutants affecting the Insulin receptor, or the downstream kinases enhances 'ventral targeting' and functional restoration, related to Figure 3.**

A-B) The Recovery Index values corresponding to the 'non-fusion' regrowth events in the mutants described in Table S1 at L4 and A3 stages at 24 h postaxotomy. N (independent replicates) = 4-8. C) The RI values corresponding to the 'ventral targeting' events in WT and mutants affecting either DAF-2 or downstream kinases at 24 h postaxotomy at A3 stage. N = 5-7. D) The total regrowth length corresponding to the 'non-fusion' events in the WT and *daf-16(lf)* at 24 h postaxotomy. N=3-5. In all plots, \*P < 0.05; \*\*\*P < 0.001; ns: non-significant; ANOVA with Tukey's multiple comparisons test. Error bars represent Standard Deviation.

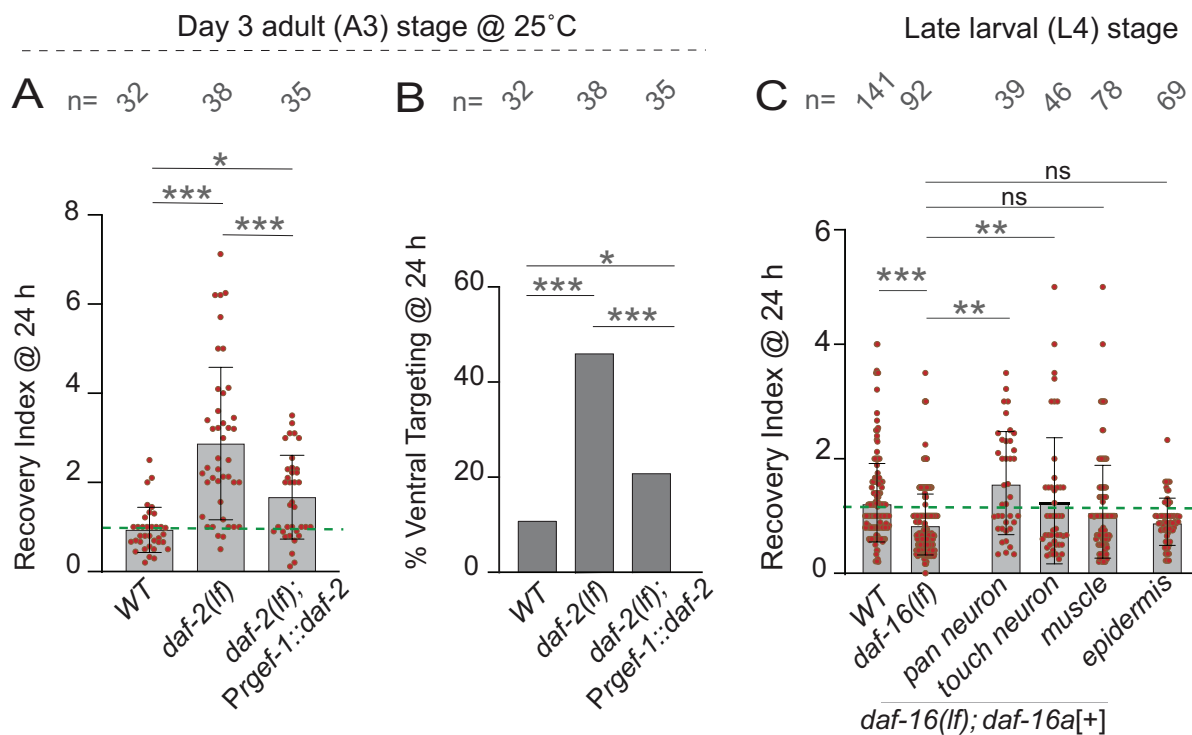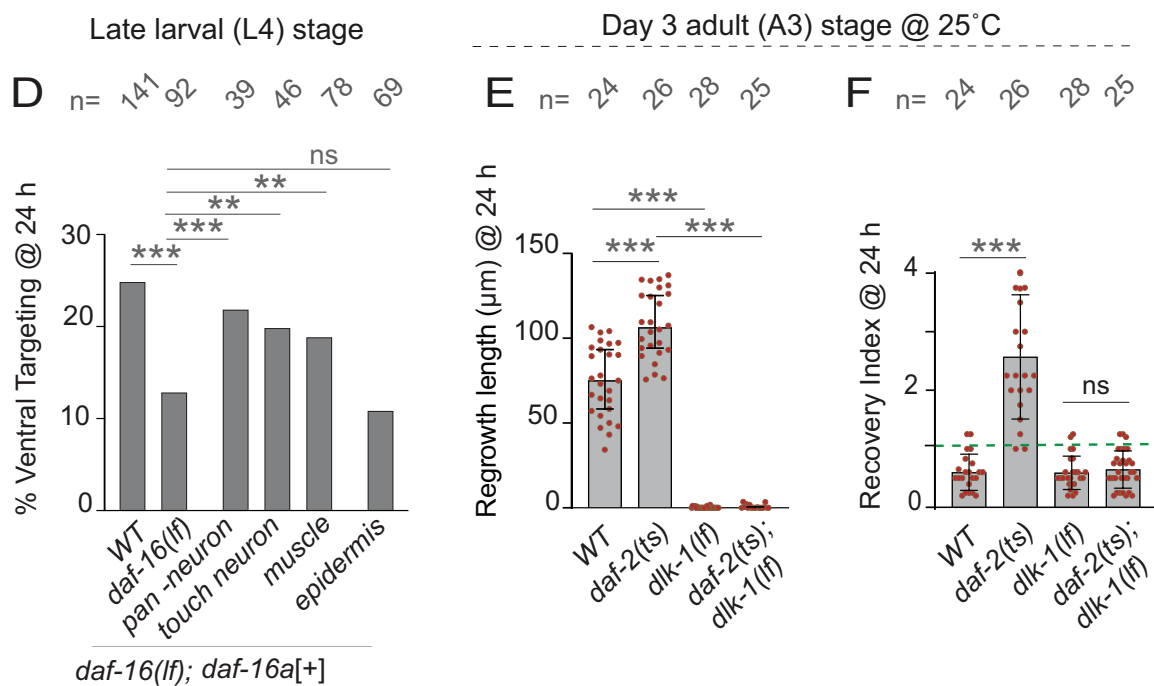

**Figure S4: DAF-16 is required both in neuron and muscle for ventral guidance of injured PLM axon, related to Figure 4.**

A-B) The quantification of Recovery Index (RI) values (A) and the (%) 'ventral targeting' events (B) corresponding to 'non-fusion' category in WT, *daf-2(m596)* and *daf-2(m596); Prgef-1::daf-2 [hpEx2906]* at 24 h postaxotomy at A3 stage. N (independent replicates) = 3-5. C-D) The RI values (C) and the (%) 'ventral targeting' events (D) corresponding to 'non-fusion' regrowth events in WT, *daf-16(lf)* background with or without the transgene of *daf-16a* expressed under the pan neuronal promoter *Prgef-1 [shrEx317]*, touch neuron-specific promoter *Pmec-4 [shrEx224]*, muscle-specific promoter *Pmyo-3 [shrEx311]*, and the epidermal promoter *Pdpy-7 [shrEx315]*. For both C and D, N=3-5. E-F) The plots show the regrowth length (E) and RI values (F) corresponding to the 'non-fusion' regrowth events at 24 h postaxotomy in WT, *daf-2(e1368ts)*, *dlk-1(lf)* and *daf-2(e1368ts); dlk-1(lf)* backgrounds at A3 stage at 25°C. For both E and F, N= 3. In B and D, \*P < 0.05; \*\*P < 0.01; \*\*\*P < 0.001; ns: non-significant, Fisher's exact test. In A, C, E and F, \*P < 0.05; \*\*P < 0.01; \*\*\*P < 0.001; ns: non-significant; ANOVA with Tukey's multiple comparisons test. Error bars represent Standard Deviation.

Late larval (L4) stage

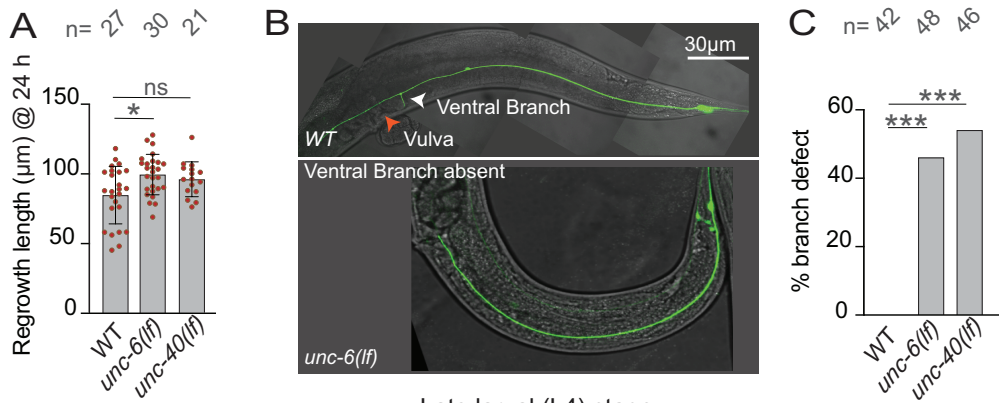

Late larval (L4) stage

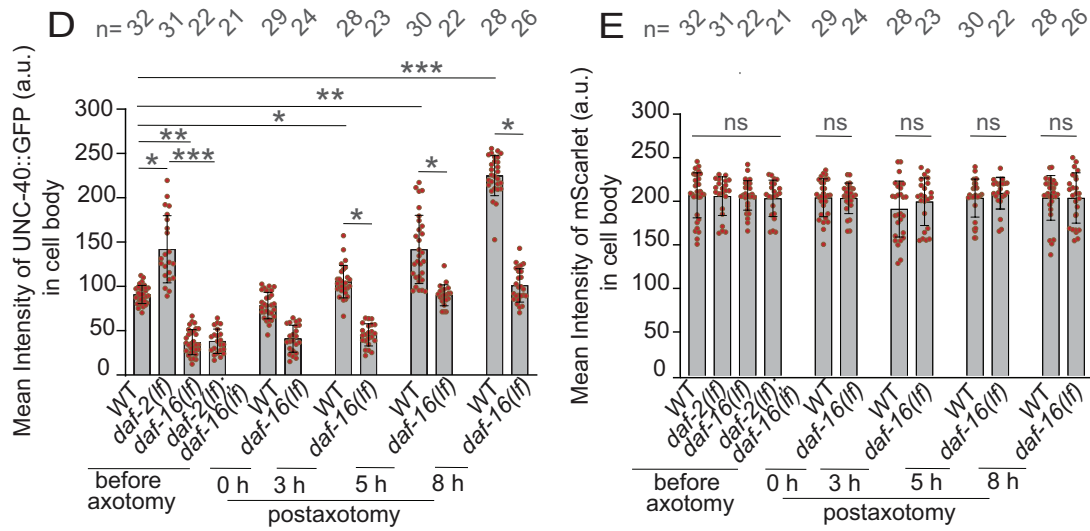

Late larval (L4) stage

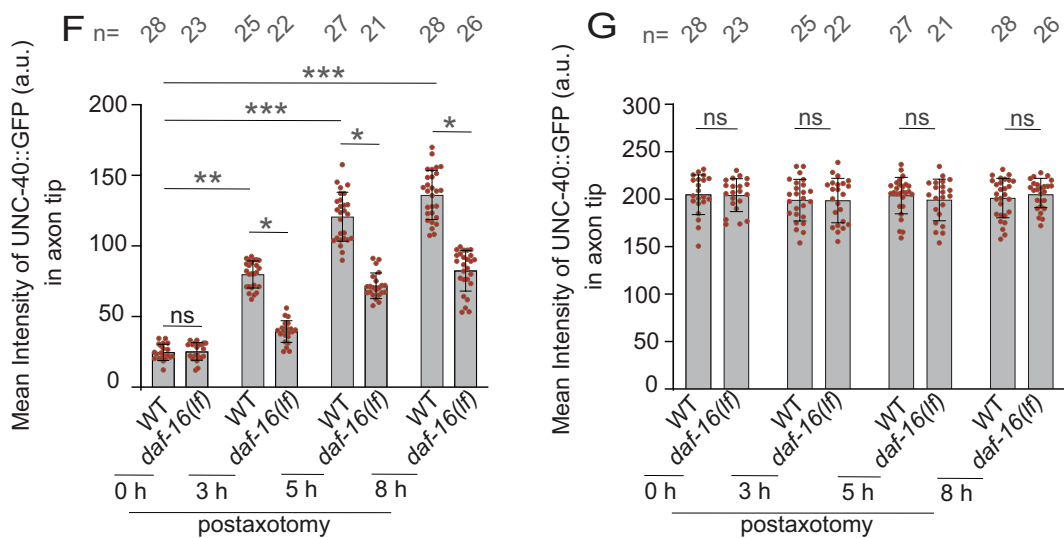



**Figure S5: Regulation of the expression and localization of UNC-40 by DAF-16 during axon regeneration, related to Figure 5.**

A) The quantification of axon regrowth length corresponding to the 'non-fusion' events in *unc-6(lf)* and *unc-40(lf)* at 24 h postaxotomy at L4 stage. N= 3-4. B) The confocal plus DIC images of PLM neuron expressing *Pmec-7::GFP (muls32)* in WT and *unc-6(lf)*. C) The percentage ventral branch defect in *unc-6(lf)* and *unc-40(lf)*. N (independent replicates) = 3-5. D-E) The plots represent the mean intensity of *Punc-40::UNC-40::GFP [icls132]* (D) and *Pmec-4::mScarlet [shrEx209]* (E) measured from the ROI on the cell body of PLM (in Fig 5D) before and at different time-points after axotomy in WT and *daf-16(lf)*. For both D and E, N= 3-6. F-G) The plots show the mean intensity of *Punc-40::UNC-40::GFP [icls132]* (F) and *Pmec-4::mScarlet [shrEx209]* (G) from ROI on PLM axon (Fig 5E) before and at different time-points after axotomy in WT and *daf-16(lf)*. In C, \*\*\*P < 0.001, Fisher's exact test. In A, D-G, \*P < 0.05; \*\*P < 0.01; \*\*\*P < 0.001; ns: non-significant; ANOVA with Tukey's multiple comparisons test. Error bars represent Standard Deviation.

**Table S1:** List of mutants studied for functional restoration assay (excel file).

[Click here to download Table S1](#)

**Table S2:** *Caenorhabditis elegans* strains used in this study.

[Click here to download Table S2](#)

**Table S3: Strains carrying newly generated extrachromosomal transgenes.**

| Strains | Transgene       | DNA construct                                                                     | Genetic Background                                                   | Concentration,                             |
|---------|-----------------|-----------------------------------------------------------------------------------|----------------------------------------------------------------------|--------------------------------------------|
| NBR568  | <i>shrEx209</i> | <i>Pmec-4::mScarlet</i><br>(PNBRGWY54)                                            | N2                                                                   | 5 ng/μl                                    |
| NBR925  | <i>shrEx435</i> | <i>Pmec-4::unc-9::GFP</i><br>(PNBRGWY561)+ <i>Pmec-4::mScarlet</i><br>(PNBRGWY54) | N2                                                                   | PNBRGWY561-10ng/ μl<br>PNBRGWY54-5ng/ μl   |
| NBR594  | <i>shrEx224</i> | <i>Pmec-4::daf-16a</i><br>(PNBRGWY107)                                            | <i>daf-16(mu86) I;</i><br><i>muls32</i><br>( <i>Pmec-7::GFP</i> ) II | 10 ng/μl                                   |
| NBR730  | <i>shrEx311</i> | <i>Pmyo-3::daf-16a</i><br>(PNBRGWY108)                                            |                                                                      | 10 ng/μl                                   |
| NBR737  | <i>shrEx315</i> | <i>Pdpy-7::daf-16a</i><br>(PNBRGWY109)                                            |                                                                      | 10 ng/μl                                   |
| NBR739  | <i>shrEx317</i> | <i>Prgef-1::daf-16a</i><br>(PNBRGWY110)                                           |                                                                      | 10 ng/μl                                   |
| NBR657  | <i>shrEx227</i> | <i>Pmec-4::daf-16f</i><br>(PNBRGWY111)                                            |                                                                      | 10 ng/μl                                   |
| NBR732  | <i>shrEx313</i> | <i>Pmyo-3::daf-16f</i><br>(PNBRGWY112)                                            |                                                                      | 10 ng/μl                                   |
| NBR738  | <i>shrEx316</i> | <i>Pdpy-7::daf-16f</i><br>(PNBRGWY113)                                            |                                                                      | 10 ng/μl                                   |
| NBR740  | <i>shrEx318</i> | <i>Prgef-1::daf-16f</i><br>(PNBRGWY114)                                           |                                                                      | 10 ng/μl                                   |
| NBR735  | <i>shrEx320</i> | <i>Pmec-4::daf-16f</i><br>(PNBRGWY111)+<br><i>Pmyo-3::daf-16f</i><br>(PNBRGWY112) |                                                                      | 10 ng/μl (each)                            |
| NBR592  | <i>shrEx436</i> | <i>Pmec-4::daf-16f</i><br>(PNBRGWY111)                                            |                                                                      | <i>muls32</i><br>( <i>Pmec-7::GFP</i> ) II |
| NBR593  | <i>shrEx437</i> | <i>Pmyo-3::daf-16f</i><br>(PNBRGWY112)                                            | 10 ng/μl                                                             |                                            |
| NBR777  | <i>shrEx389</i> | <i>Pmec-4::dlk-1</i><br>(PNBRGWY13)                                               | <i>muls32</i> ( <i>Pmec-7::GFP</i> )II                               | 0.5 ng/μl                                  |
| NBR779  | <i>shrEx391</i> | <i>Pmec-4::dlk-1</i><br>(PNBRGWY13)                                               | <i>daf-16(mu86)I;</i><br><i>muls32</i> ( <i>Pmec-7::GFP</i> ) II     | 0.5 ng/μl                                  |

**Table S4:** List of the neuronal target genes of DAF-16 categorized under the Gene Ontology term (GO:0097485) or neuronal projection and guidance (excel file).

[Click here to download Table S4](#)
